# Supplementary material for: A natural hyperbranched proteoglycan inhibits IAPP amyloid fibrillation and attenuates β-cell apoptosis
Source: Royal Society of Chemistry journal article supplement (doi:10.1039/c6ra23429a), 2016-01-01
Supplement: c6ra23429a1.pdf [file c6ra23429a1.pdf]

**Electronic supplementary material (ESM):**

1    10    20    30    37  
KCNTATCAT QRLANFLVHS SNNFGAILSS TNVGSNTY-NH<sub>2</sub>

**Fig. S1** The primary sequence of IAPP with an amidated C-terminus and a disulfide bond between Cys2 and Cys7. Cys: cysteine.

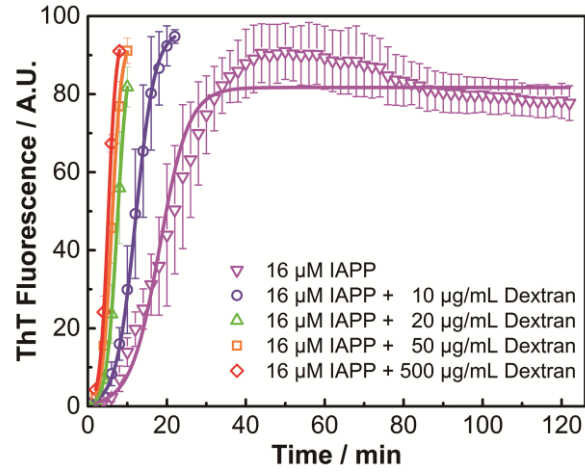

**Fig. S2** Kinetics of 16  $\mu\text{M}$  IAPP fibrillation in the absence or presence of 10, 20, 50 and 500  $\mu\text{g/mL}$  dextran (molecular weight 70,000) detected by ThT assay.

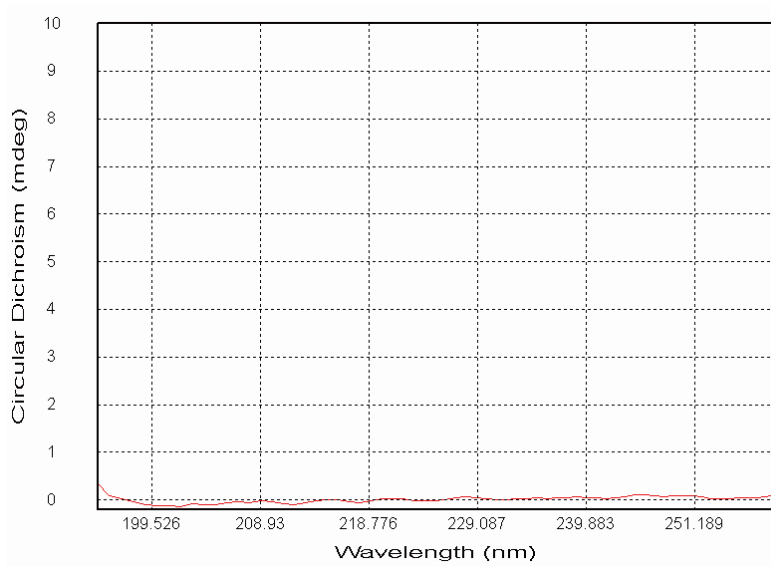

**Fig. S3** CD spectrum of 50 µg/mL *FYGL*. The signal of phosphate buffer was subtracted.

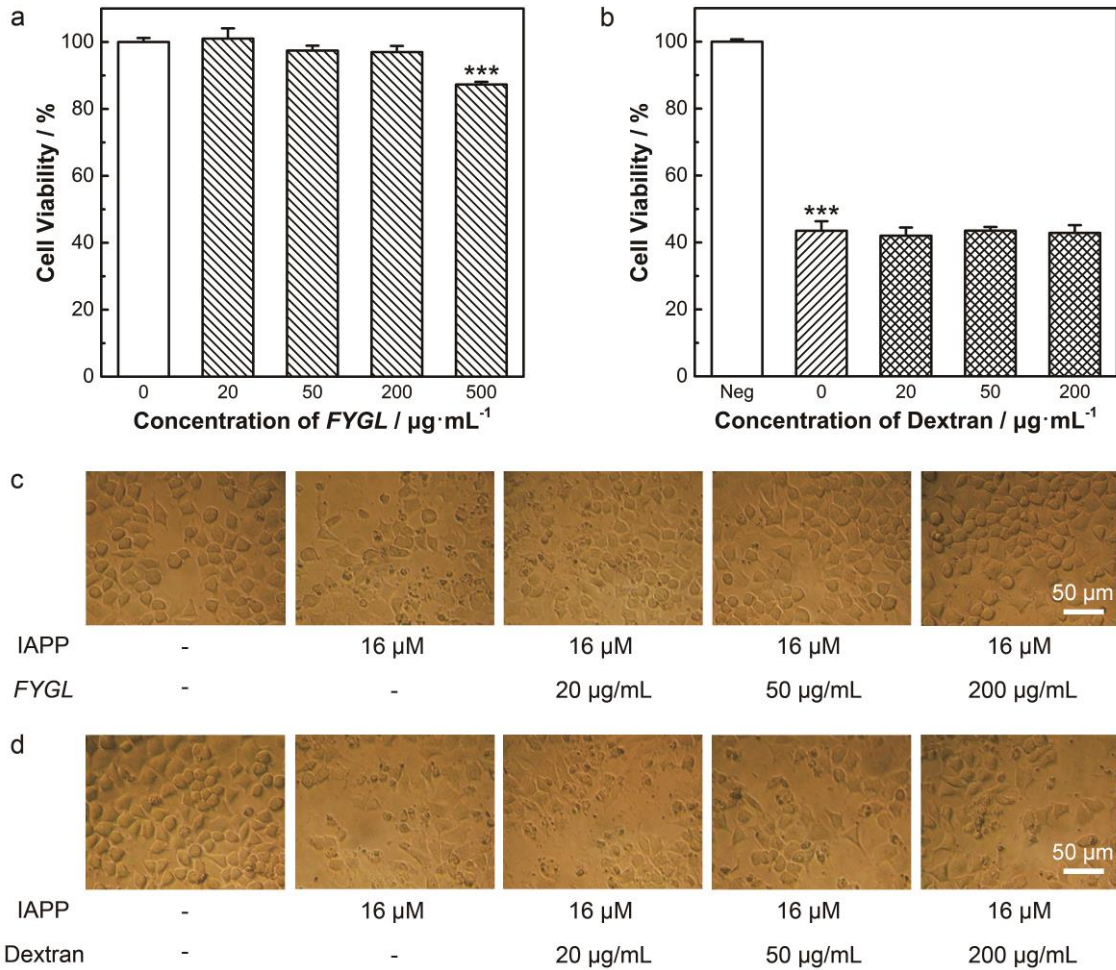

**Fig. S4** (a) Cell viability of RIN5fm cells incubated with 0, 20, 50, 200 and 500  $\mu\text{g}/\text{mL}$  *FYGL* for 24 h. (b) Cell viability of RIN5fm cells incubated with 16  $\mu\text{M}$  IAPP in the absence or presence of 20, 50 and 200  $\mu\text{g}/\text{mL}$  dextran for 24 h. \*\*\* $P < 0.01$  vs. negative control group. The morphology of RIN5fm cells incubated with IAPP in the absence or presence of 20, 50 or 200  $\mu\text{g}/\text{mL}$  *FYGL* (c) or linear dextran (d) observed by inverted microscope.
